# Supplementary material
Source: PubMed Central journal article supplement (PMC2492609)
Supplement: pp.108.120196_1.pdf [file pp.108.120196_1.pdf]

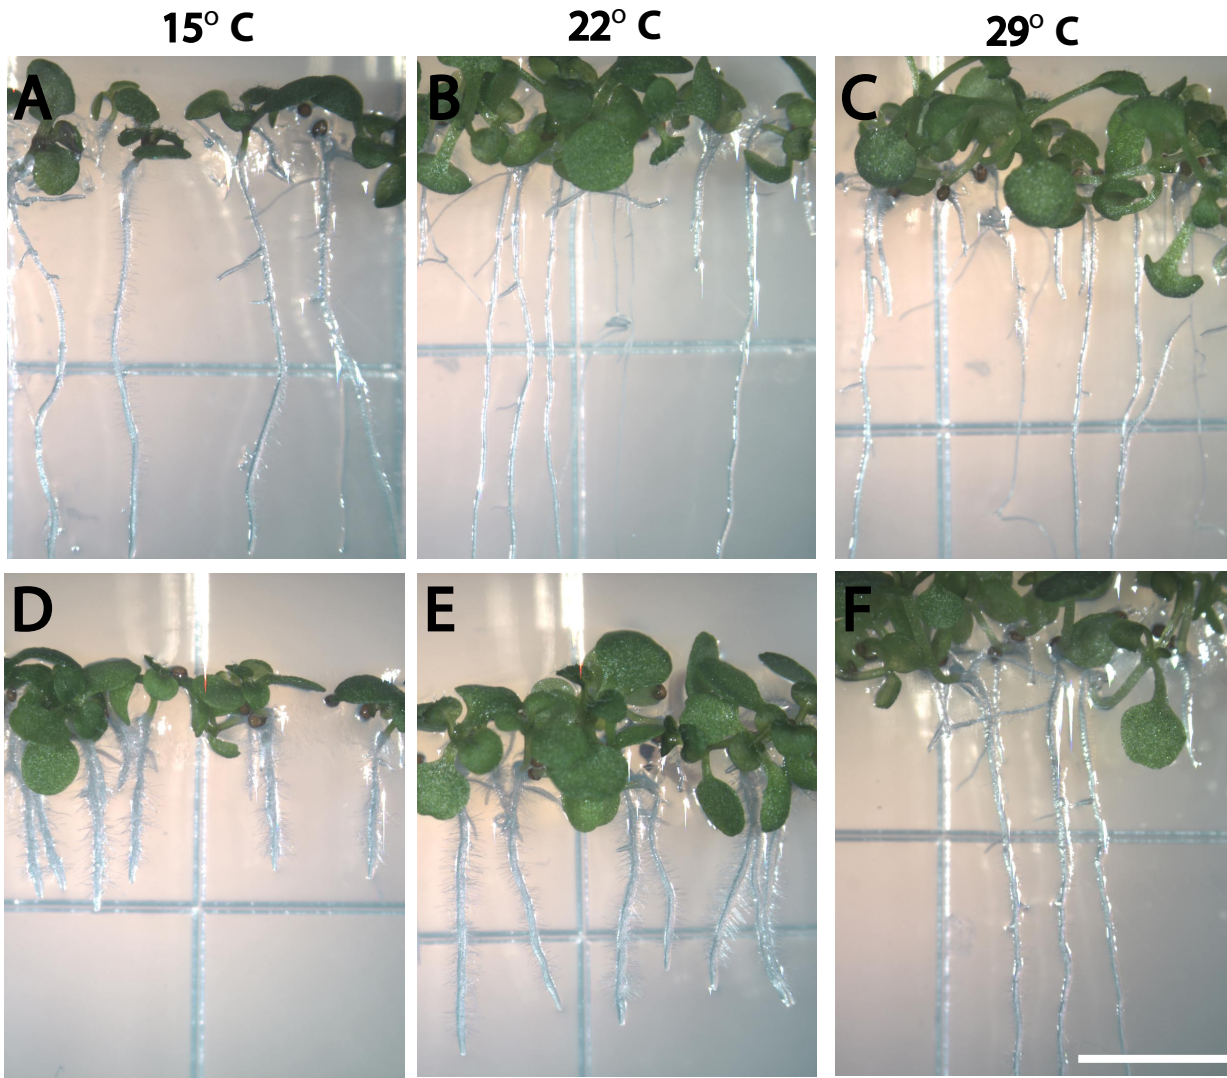

**Figure S1.** Mutant 16-2 is rescued by growth at high temperature. All seedlings were germinated at 22 °C for 24 hours and then shifted to the indicated temperatures Col-0 (A to C) and 16-2 (D to E). To normalize root length in Col-0 the plates were staggered so that the 15 °C plates were grown for a total of 7 days, the 22 °C plates were grown for 6 days, and the 29 °C plates were grown for 5 days. Scale bar=5 mm.
