# Supplementary material
Source: PubMed Central journal article supplement (PMC2492609)
Supplement: pp.108.120196_2.pdf [file pp.108.120196_2.pdf]

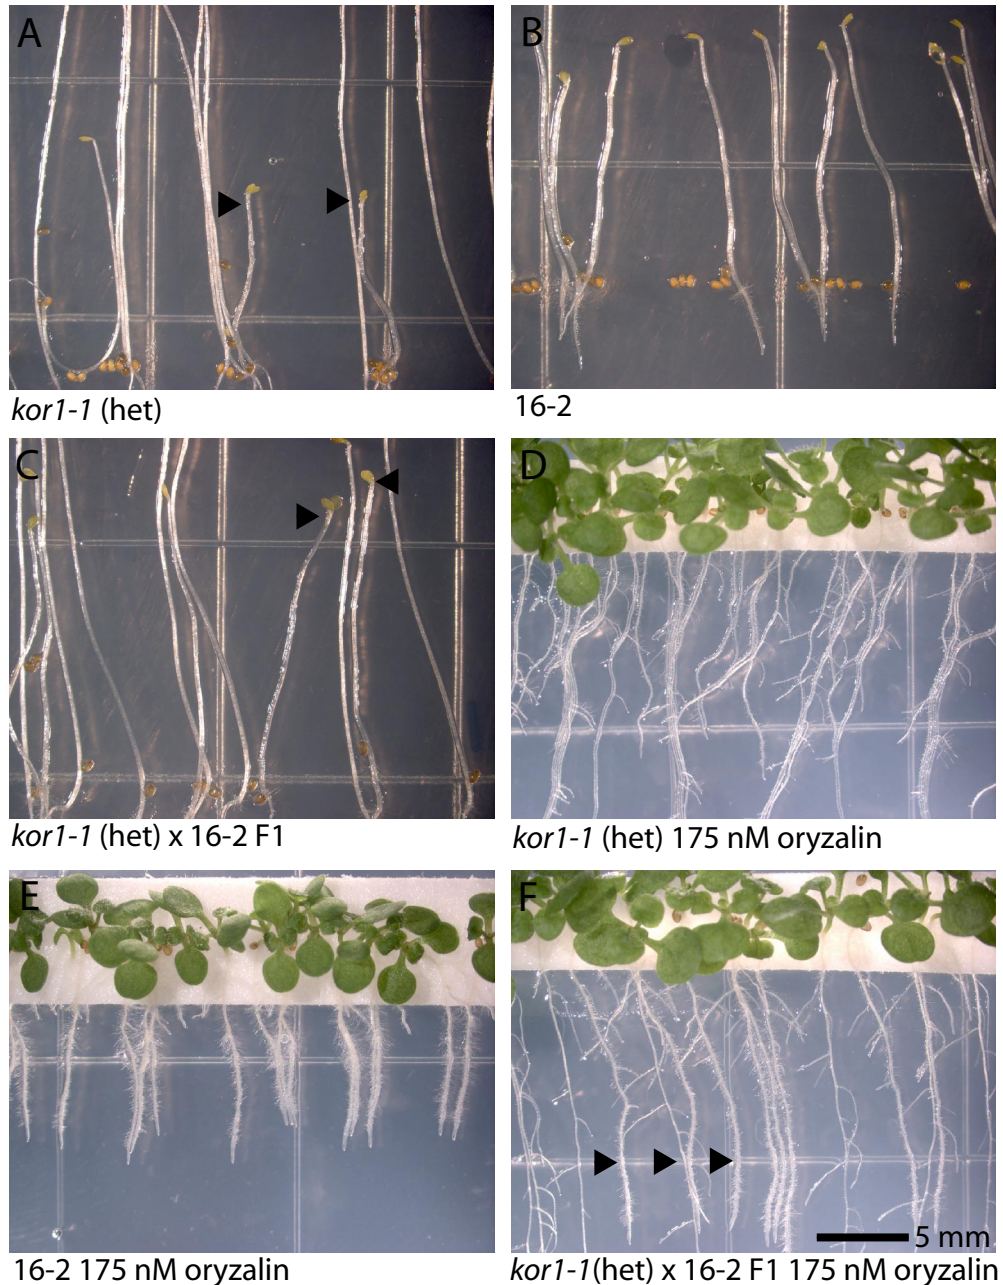

**Figure S2.** Mutant 16-2 carries an allele of *kor1*. (A-C) Five day old etiolated seedlings. (A) Mutant *kor1-1*<sup>+/-</sup> seedlings segregate with short hypocotyls (arrowheads). (B) Mutant 16-2 exhibit short hypocotyls. (C) F1 progeny of *kor1-1*<sup>+/-</sup> x 16-2 seedlings segregate with short hypocotyls (arrowheads) indicating failure to complement, and that the mutation in 16-2 is allelic to *kor1-1*. (D-F) Seedlings grown on MS plates for 5 days then transferred to plates containing 175 nM oryzalin. (D) The *kor1-1* mutant does not exhibit oryzalin hypersensitivity. (E) The 16-2 mutant is sensitive to oryzalin as indicated by cell swelling. (F) F1 progeny of *kor1-1*<sup>+/-</sup> x 16-2 transferred to oryzalin induces root swelling (arrowheads) indicating failure to complement. Scale bar=5 mm.
