# Supplementary material
Source: PubMed Central journal article supplement (PMC2492609)
Supplement: pp.108.120196_3.pdf [file pp.108.120196_3.pdf]

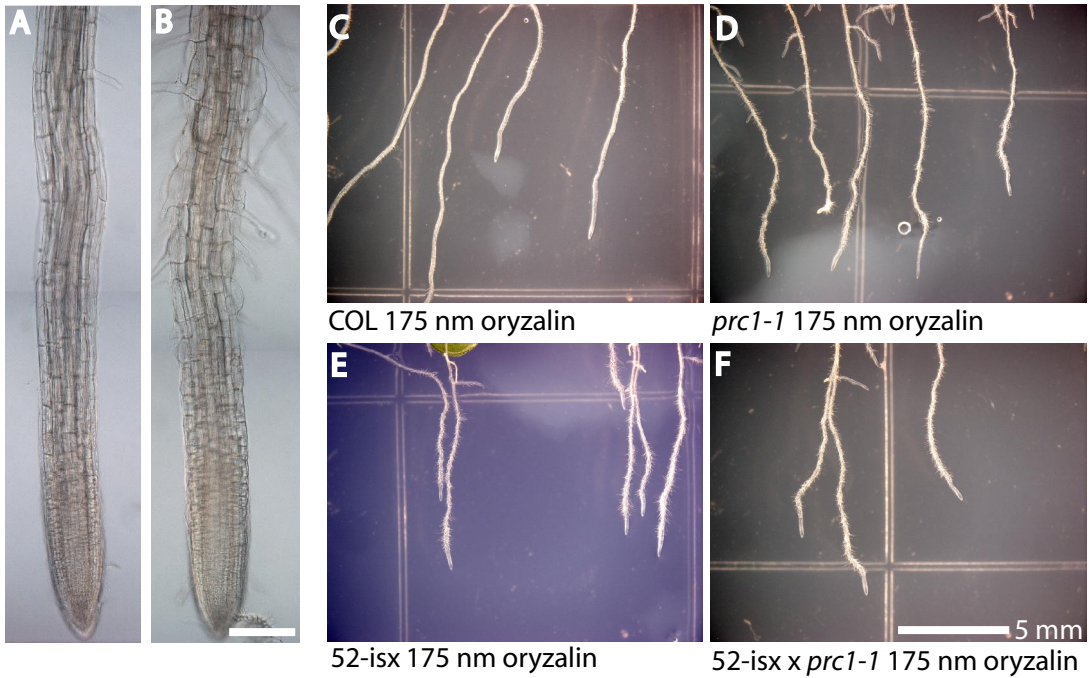

**Figure S3.** Mutant 52-isx carries an allele of *prc1*. (A-F) Five day old light grown seedlings grown on 175 nM oryzalin. DIC image of COL (A) and 52-isx (B), note root swelling begins near the end of the elongation zone (before root hair emergence) but is more severe in fully differentiated trichoblast cells. Col (C) does not exhibit apparent swelling while *prc1-1* (D) and 52-isx (E) have identical phenotypes. F1 seedlings from 52-isx x *prc1-1* fail to complement indicating that the mutation in 52-isx is allelic to *prc1-1*. Scale bar B=100  $\mu$ m; F=5 mm.
